# Supplementary material
Source: Royal Society of Chemistry journal article supplement (doi:10.1039/d6ta02567f)
Supplement: d6ta02567f1.pdf [file d6ta02567f1.pdf]

## Supplementary Information

### Multiple Synergistic Effects Induced by Ge Doping Enhance the Thermoelectric Performance of n-Type PbTe

Jiaying Luo,<sup>a#</sup> Xiaobo Tan,<sup>a#</sup> Qian Deng,<sup>b#</sup> Ruiheng Li,<sup>a</sup> Fan Feng,<sup>a</sup> Zhilong Zhao,<sup>a</sup> Liwei Lin,<sup>a</sup> and Ran Ang<sup>a,c,d\*</sup>

<sup>a</sup>Key Laboratory of Radiation Physics and Technology, Ministry of Education, Institute of Nuclear Science and  
Technology, Sichuan University, Chengdu 610064, China

<sup>b</sup>Faculty of Materials Science and Engineering, Kunming University of Science and Technology, Kunming 650093,  
China

<sup>c</sup>College of Physics, Sichuan University, Chengdu 610064, China

<sup>d</sup>Institute of New Energy and Low-Carbon Technology, Sichuan University, Chengdu 610065, China

#Jiaying Luo, Xiaobo Tan, and Qian Deng contributed equally to this work.

\*Corresponding author and Email: rang@scu.edu.cn (R.A)

## Single Kane Band (SKB) Model

The density-of-state (DOS) effective mass ( $m^*$ ), Lorenz number ( $L$ ), and other transport parameters were derived within the framework of the single Kane band (SKB) model. The relevant expressions are as follows<sup>1, 2</sup>:

Seebeck coefficient:

$$S = \frac{k_B}{e} \left[ \frac{{}^1F_{-2}^1}{{}^0F_{-2}^1} - \eta \right] \quad (\text{eq. S1})$$

Hall carrier density:

$$n_H = \frac{1}{A} \left[ \frac{2m^* k_B T}{\hbar^2} \right]^{3/2} {}^0F_0^{2/3} \quad (\text{eq. S2})$$

Hall factor:

$$A = \frac{3K(K+2)}{(2K+1)^2} \frac{{}^0F_{-4}^{1/2} {}^0F_0^{3/2}}{({}^0F_{-2}^1)^2} \quad (\text{eq. S3})$$

Lorenz number:

$$L = \left( \frac{k_B}{e} \right)^2 \left[ \frac{{}^2F_{-2}^1}{{}^0F_{-2}^1} - \left( \frac{{}^1F_{-2}^1}{{}^0F_{-2}^1} \right)^2 \right] \quad (\text{eq. S4})$$

Carrier mobility:

$$\mu_H = \frac{2\pi\hbar^4 e C_l}{m_1^* (2m^* k_B T)^{3/2}} \frac{3 {}^0F_{-2}^1}{\Xi^2 {}^0F_0^{3/2}} \quad (\text{eq. S5})$$

Generalized Fermi integral:

$${}^nF_l^m(\eta, \alpha) = \int_0^\infty \left( -\frac{\partial f}{\partial \varepsilon} \varepsilon^n \right) (\varepsilon + \varepsilon^2 \alpha)^m (1 + 2\varepsilon \alpha)^l d\varepsilon \quad (\text{eq. S6})$$

Here,  $k_B$  is the Boltzmann constant,  $\varepsilon = E/k_B T$  and  $\eta = E_F / (k_B T)$  represent the reduced carrier energy and reduced chemical potential, respectively, with  $E_F$  being the Fermi energy. The generalized Fermi integral is denoted as  ${}^nF_l^m(\eta, \alpha)$ .  $m^*$  and  $m_1^*$  are the density-of-states effective mass and inertial effective mass, respectively,  $K$  is the

anisotropy factor ( $K = 3.6$  for n-type PbTe),<sup>3</sup>  $\Xi$  is the deformation potential of materials,  $C_l$  is the average longitudinal elastic constant ( $C_l = 7 \times 10^{10}$  Pa for n-type PbTe).<sup>4</sup>

## Calculation of Average $PF_{\text{avg}}$ and $zT_{\text{avg}}$

The average power factor ( $PF_{\text{avg}}$ ) and average figure of merit ( $zT_{\text{avg}}$ ) over specified temperature ranges were determined using the following equations<sup>5</sup>:

$$PF_{\text{avg}} = \frac{\int_{T_c}^{T_h} PF dT}{T_h - T_c} \quad (\text{eq. S7})$$

$$zT_{\text{avg}} = \frac{\int_{T_c}^{T_h} zT dT}{T_h - T_c} \quad (\text{eq. S8})$$

## Thermoelectric Module Calculation

Ignoring contact resistance, the parameters for device calculation are as follows:

Internal resistance:

$$R_{in} = N \left( \frac{L}{A_p} \bar{\rho}_p + \frac{L}{A_n} \bar{\rho}_n \right) \quad (\text{eq. S9})$$

Where  $N$  is the number of thermocouple pairs;  $L$  is the leg length;  $A_p$  and  $A_n$  are the cross-sectional areas, respectively;  $\bar{\rho}_p$  and  $\bar{\rho}_n$  represent the average electrical resistivities.

Open-circuit voltage:

$$V_{oc} = N (T_h - T_c) (\bar{S}_p - \bar{S}_n) \quad (\text{eq. S10})$$

Open-circuit current:

$$I = \frac{V_{oc}}{2R_{in}} \quad (\text{eq. S11})$$

Output power:

$$P = \frac{V_{oc}^2}{4R_{in}} \quad (\text{eq. S12})$$

Open-circuit heat flow:

$$Q_{oc} = N \left( \frac{A_p}{H} \bar{\kappa}_p + \frac{A_n}{H} \bar{\kappa}_n \right) \Delta T \quad (\text{eq. S13})$$

Total heat flow:

$$Q_{input} = Q_{oc} - \frac{R_{in} I^2 + N(\beta_p + \beta_n) T_h I}{2} + N [S_p(T_h) - S_n(T_h)] T_h I \quad (\text{eq. S14})$$

Conversion efficiency:

$$\eta = \frac{P}{Q_{input}} \quad (\text{eq. S15})$$

Here,  $T_h$  and  $T_c$  are the hot-side and cold-side temperatures, respectively;  $\bar{S}_n$  and  $\bar{S}_p$  are the average Seebeck coefficients;  $\bar{\kappa}_n$  and  $\bar{\kappa}_p$  are the average thermal conductivities;  $\beta_n$  and  $\beta_p$  are the Thomson correction coefficients, defined as:

$$\beta_n = \frac{T_c}{T_h} \left[ [S_n(T_c) - \bar{S}_n] + [\bar{S}_n - S_n(T_h)] \right] \quad (\text{eq. S16})$$

$$\beta_p = \frac{T_c}{T_h} \left[ [\bar{S}_p - S_p(T_c)] + [S_p(T_h) - \bar{S}_p] \right] \quad (\text{eq. S17})$$

## Supplementary details

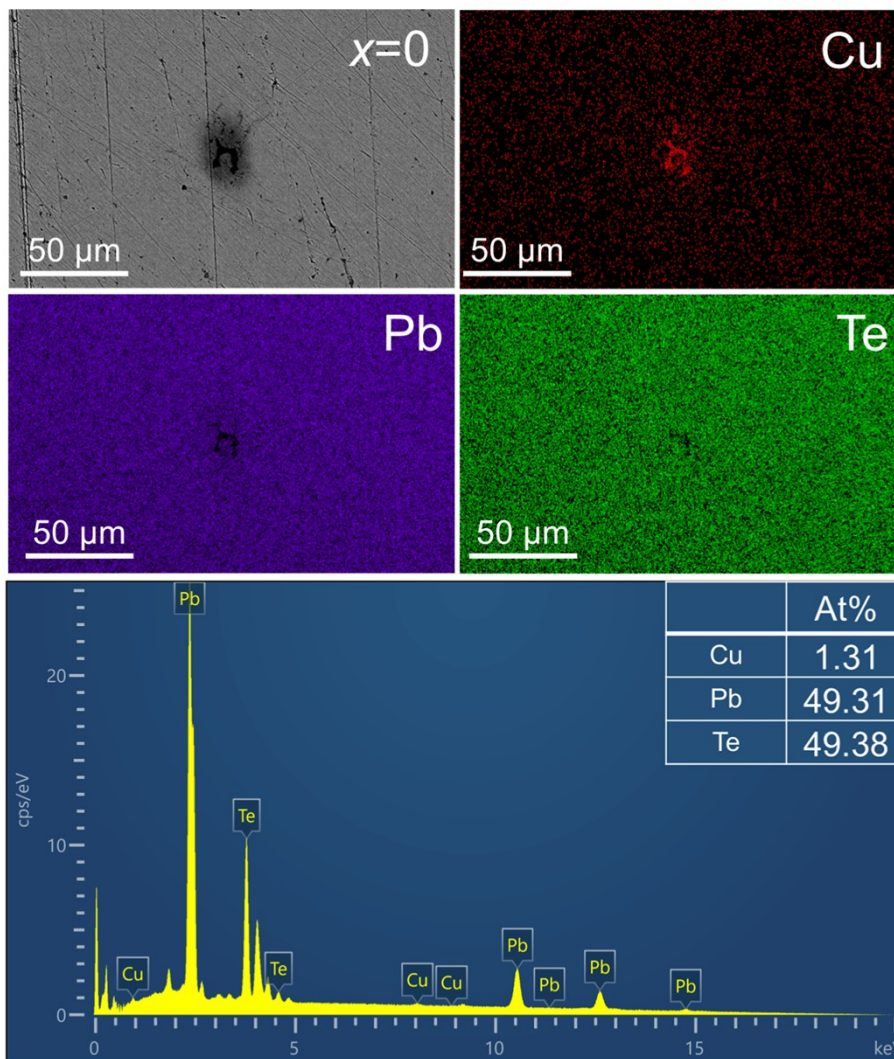

**Fig. S1** Microstructure and elemental distribution of the  $\text{Cu}_{0.002}\text{PbTe}$  ( $x = 0$ ) sample with SEM image at a scale bar of 50  $\mu\text{m}$  and corresponding EDS elemental mapping.

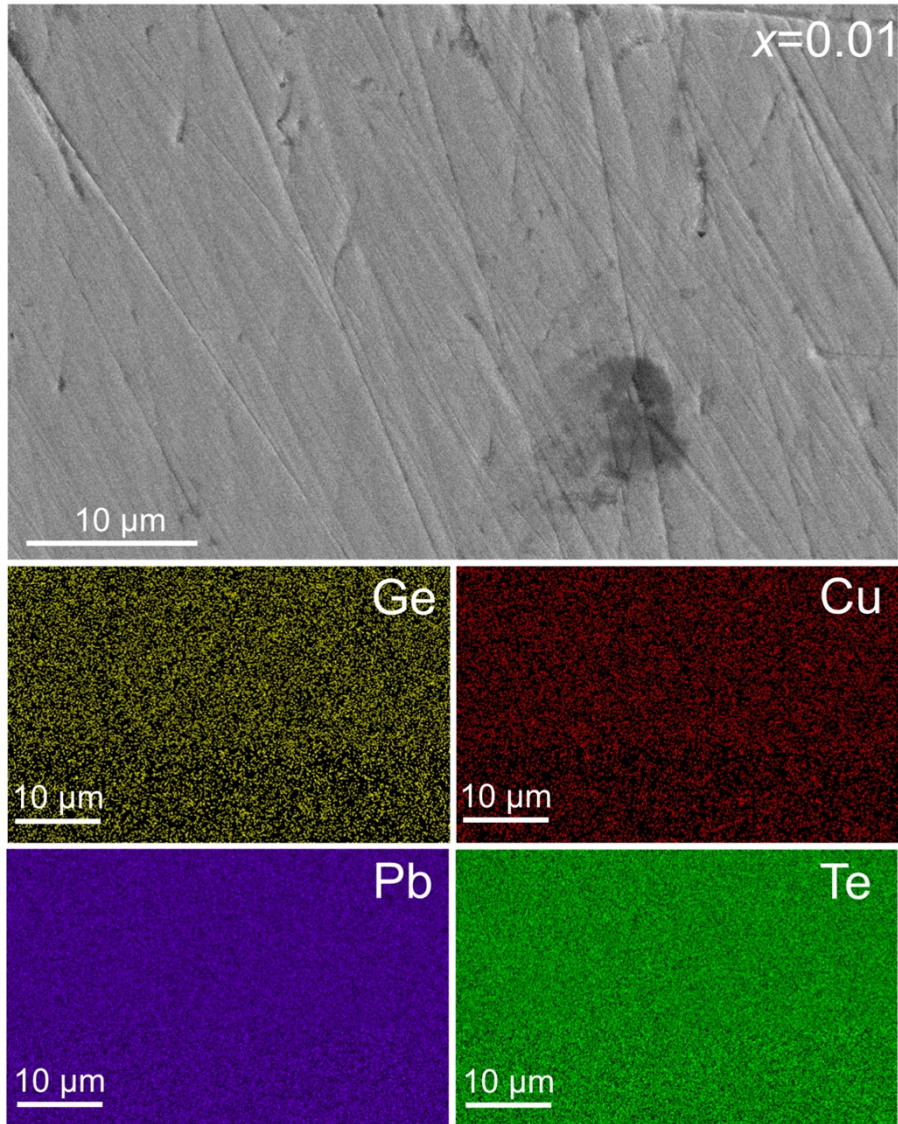

**Fig. S2** Microstructure and elemental distribution of the  $\text{Cu}_{0.002}\text{Pb}_{0.99}\text{Ge}_{0.01}\text{Te}$  ( $x = 0.01$ ) sample with SEM image at a scale bar of 10 μm and corresponding EDS elemental mapping.

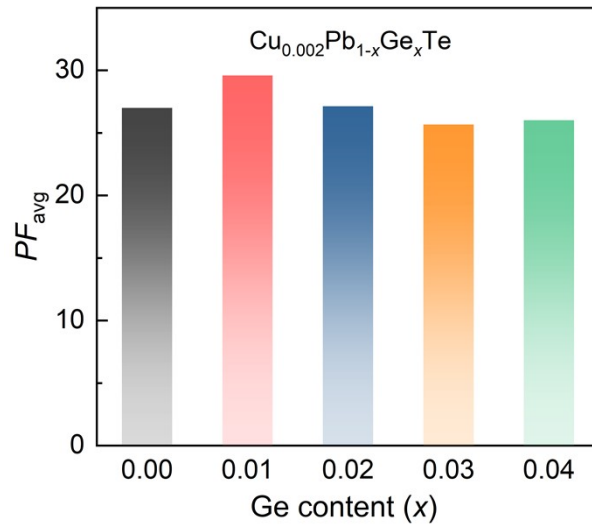

**Fig. S3** Average power factor ( $PF_{\text{avg}}$ ) of  $\text{Cu}_{0.002}\text{Pb}_{1-x}\text{Ge}_x\text{Te}$  ( $x = 0-0.04$ ) with varying Ge content.

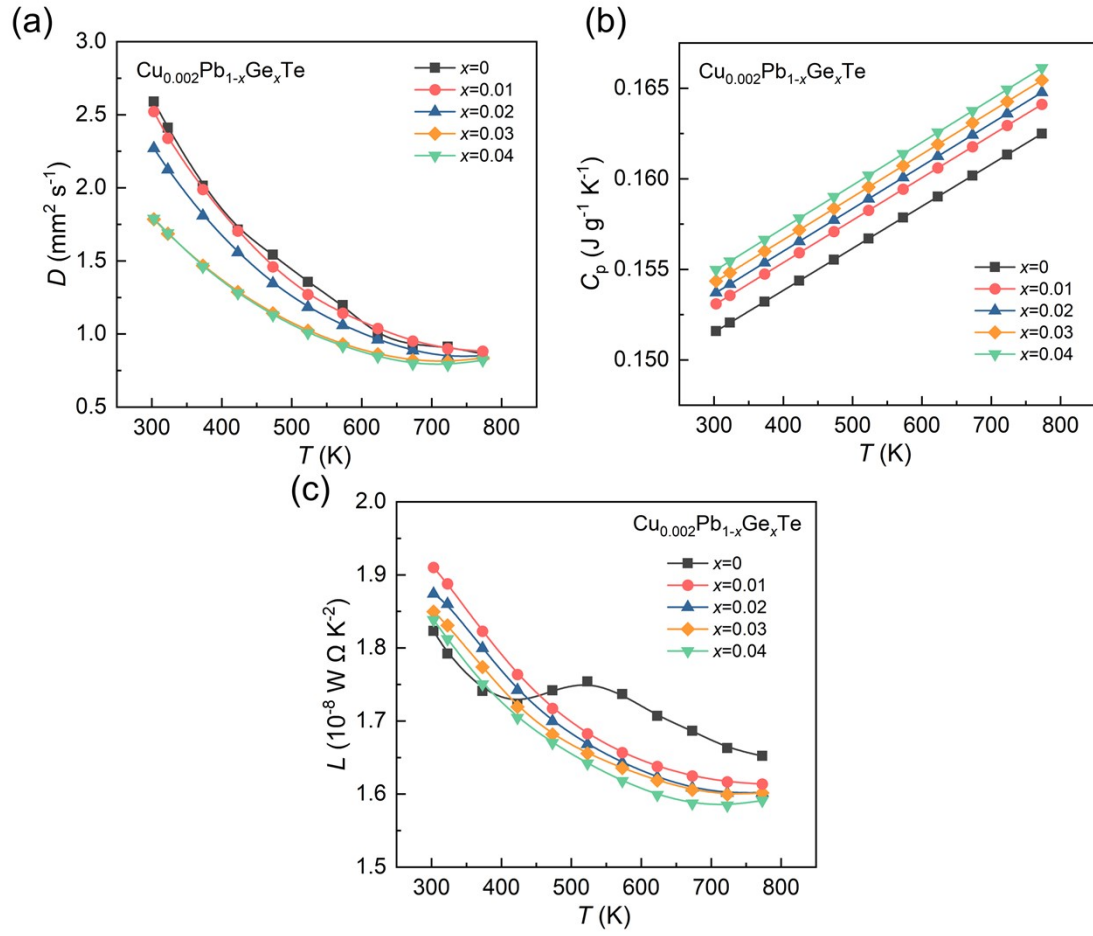

**Fig. S4** Temperature-dependent (a) thermal diffusivity ( $D$ ), (b) heat capacity ( $C_p$ ), (c) Lorenz number ( $L$ ) of  $\text{Cu}_{0.002}\text{Pb}_{1-x}\text{Ge}_x\text{Te}$  ( $x = 0-0.04$ ).

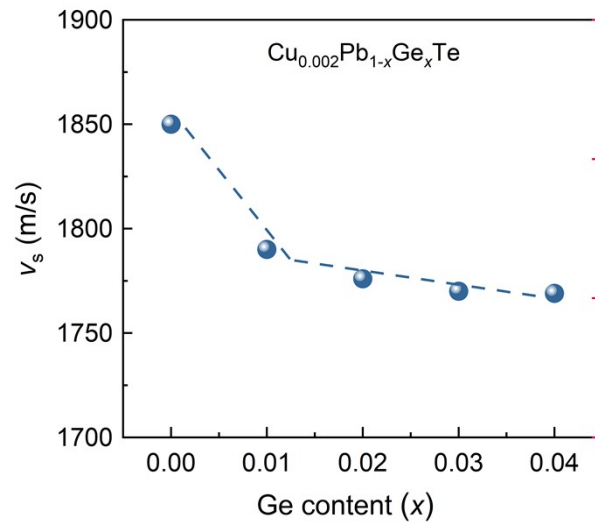

**Fig. S5** Room-temperature average sound velocity ( $v_s$ ) as a function of Ge doping content.

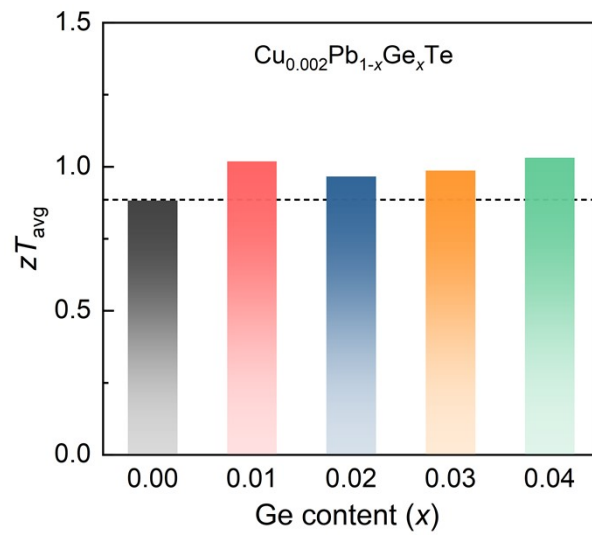

**Fig. S6** Average figure of merit ( $zT_{\text{avg}}$ ) of  $\text{Cu}_{0.002}\text{Pb}_{1-x}\text{Ge}_x\text{Te}$  ( $x = 0-0.04$ ) with varying Ge content.

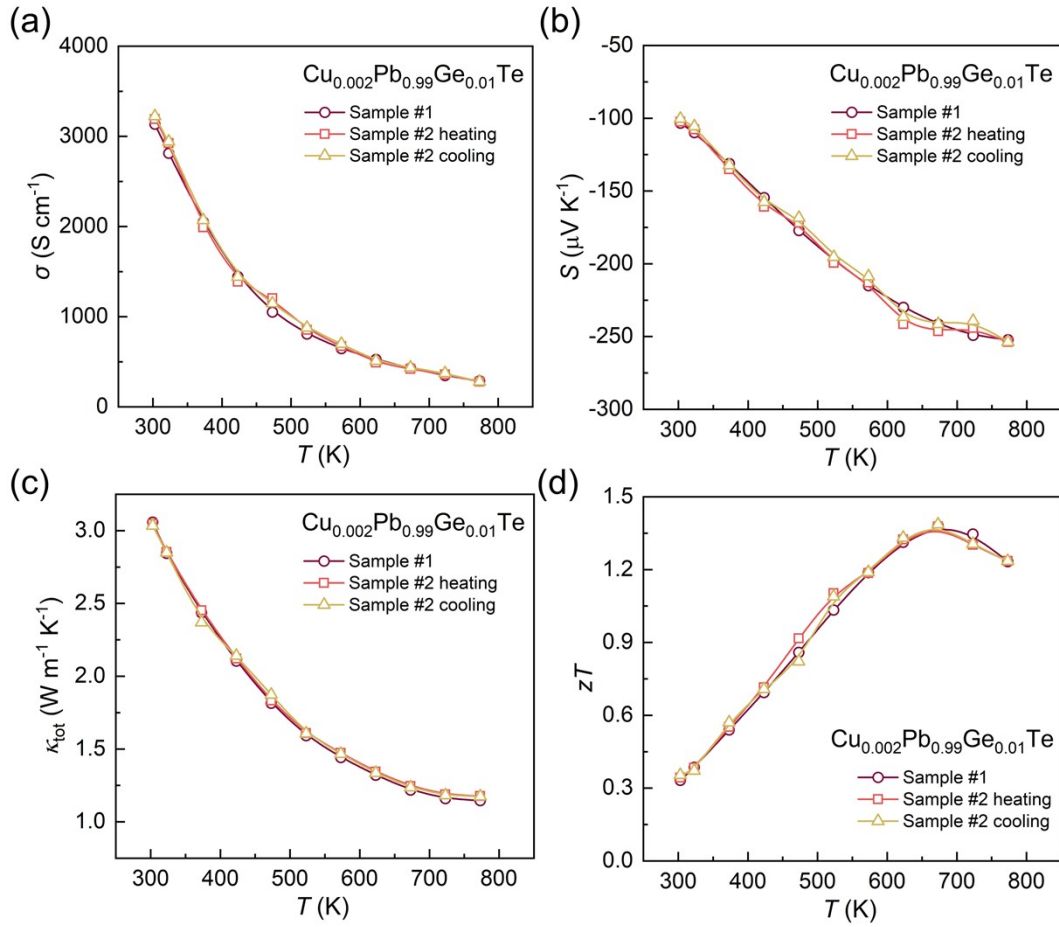

**Fig. S7** Repeated measurements of temperature-dependent (a) electrical conductivity ( $\sigma$ ), (b) Seebeck coefficient ( $S$ ), (c) total thermal conductivity ( $\kappa_{\text{tot}}$ ), and (d) figure of merit  $zT$  for n-type  $\text{Cu}_{0.002}\text{Pb}_{0.99}\text{Ge}_{0.01}\text{Te}$ .

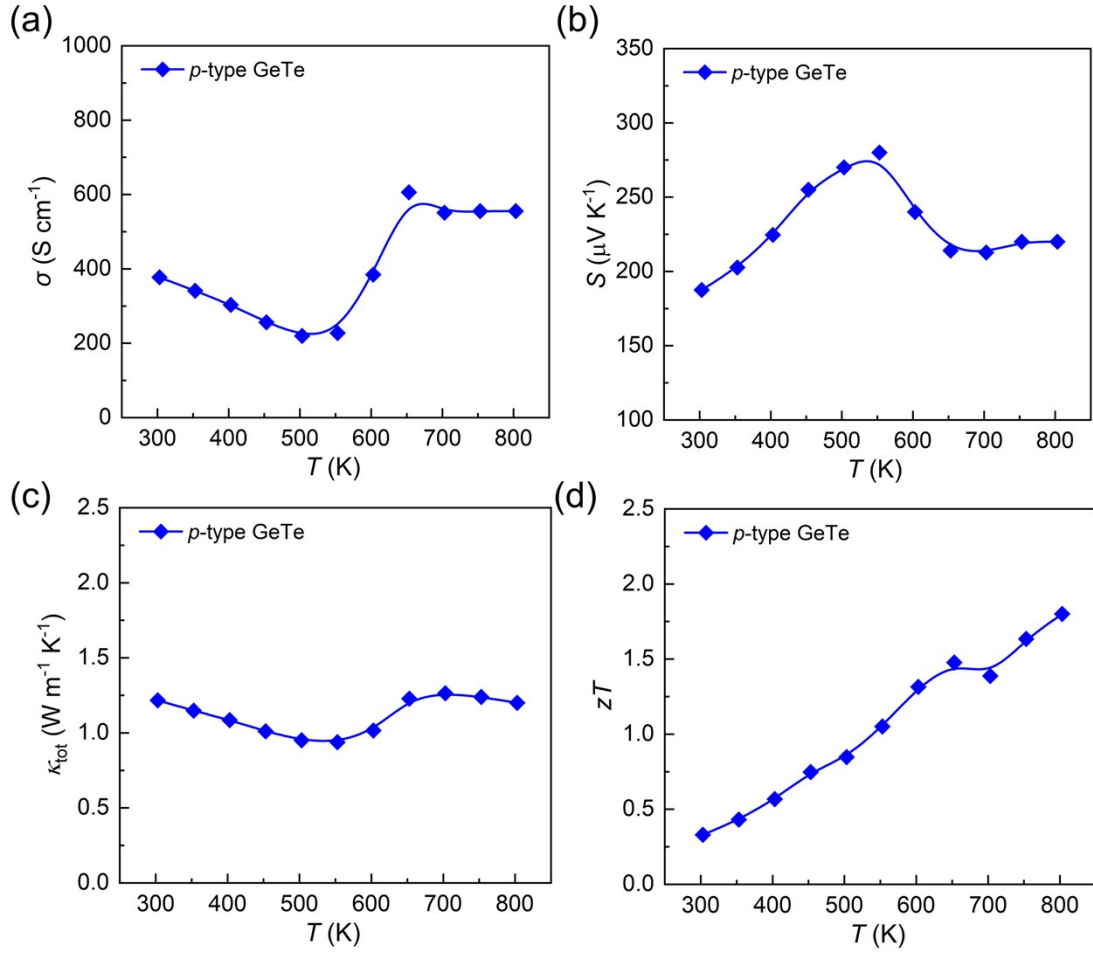

**Fig. S8** Thermoelectric performance of p-type  $\text{Ge}_{0.83}\text{Zr}_{0.02}\text{Pb}_{0.15}\text{Te}-3\%\text{Cu}$  for the simulation calculation. Temperature-dependent (a) electrical conductivity ( $\sigma$ ), (b) Seebeck coefficient ( $S$ ), (c) total thermal conductivity ( $\kappa_{\text{tot}}$ ), and (d) figure-of-merit  $zT$ .

**Table S1** Density of sintered  $\text{Cu}_{0.002}\text{Pb}_{1-x}\text{Ge}_x\text{Te}$  samples in this work.

| Composition | Measure density ( $\text{g cm}^{-3}$ ) | Relative density (%) |
|-------------|----------------------------------------|----------------------|
| $x = 0$     | 8.059                                  | 98.28                |
| $x = 0.01$  | 7.920                                  | 96.59                |
| $x = 0.02$  | 8.010                                  | 97.68                |
| $x = 0.03$  | 8.156                                  | 99.46                |
| $x = 0.04$  | 8.028                                  | 97.90                |

## References

1. E. O. Kane, *J. Phys. Chem. Solids*, 1957, **1**, 249-261.
2. Y. I. Ravich, B. A. Efimova and V. I. Tamarchenko, *Phys. Status Solidi B*, 1971, **43**, 453-469.
3. H. A. Lyden, *Phys. Rev.*, 1964, **135**, A514-A521.
4. Y. Pei, Z. M. Gibbs, A. Gloskovskii, B. Balke, W. G. Zeier and G. J. Snyder, *Adv. Energy Mater.*, 2014, **4**, 1400486.
5. J. Zhu, R. Li, X. Tan, Q. Sun, G. Su, S. Huo, P. Song, M. Hong and R. Ang, *J. Am. Chem. Soc.*, 2025, **147**, 37555-37564.
